# Supplementary material for: Serbia within the European context: An analysis of premature mortality
Source: Popul Health Metr. 2009 Aug 5;7:12. doi: 10.1186/1478-7954-7-12 (PMC2736921; doi:10.1186/1478-7954-7-12)
Supplement: Additional file 2 — Cause-specific age-standardized death rates per 100,000; Serbia, EURO A, EURO B, and EURO C in 2000 (standard European population). The data provided represent the distribution of cause-specific age-standardized death rates per 100,000 (standard European population), in four regions: Serbia, EURO A, EURO B, and EURO C in 2000. [file 1478-7954-7-12-S2.xls]

## Sheet: Additional file 2
Additional file 2 – Cause-specific age-standardized death rates per 100,000 population; Serbia, EURO A, EURO B, and EURO C regions in 2000 (standard European population)
SERBIA						Age intervals											Age intervals											Age intervals
		MALES	A0-4M	A5-14M	A15-29M	A30-44M	A45-59M	A60-69	A70+	Total_M			FEMALES	A0-4F	A5-14F	A15-29F	A30-44F	A45-59F	A60-69	A70+	Total_F			PERSONS	A0-4F	A5-14F	A15-29F	A30-44F	A45-59F	A60-69	A70+	Total_P
	Code	Cause										Code	Cause										Code	Cause
	U000	All Causes	23.6669	4.1974	22.4405	56.481	218.201	298.978	645.639	1269.6		U000	All Causes	17.857	2.86865	8.76516	27.0802	107.693	172.298	546.119	882.681		U000	All Causes	20.8431	3.55007	15.6997	41.6635	161.981	230.807	586.029	1060.57
	U001	Communicable, maternal, perinatal and nutritional conditions	16.5841	0.219267	0.732641	1.94384	4.14503	5.26615	11.1733	40.0643		U001	Communicable, maternal, perinatal and nutritional conditions	11.7372	0.230811	0.642034	0.862254	1.91319	2.11864	7.27461	24.7788		U001	Communicable, maternal, perinatal and nutritional conditions	14.2284	0.224891	0.687979	1.39874	3.0096	3.57236	8.83808	31.96
	U002	Infectious and parasitic diseases	1.12288	0.0939717	0.352753	1.47842	2.86763	2.63308	2.81701	11.3657		U002	Infectious and parasitic diseases	1.00474	0.131892	0.279145	0.565854	0.956597	1.09463	1.42639	5.45926		U002	Infectious and parasitic diseases	1.06546	0.112446	0.31647	1.0185	1.89541	1.80518	1.98406	8.19753
	U038	Respiratory infections	1.0365	0.125296	0.379888	0.438049	1.19919	2.55079	8.23797	13.9677		U038	Respiratory infections	1.05041	0.098919	0.279145	0.188618	0.90625	0.988699	5.56294	9.07498		U038	Respiratory infections	1.04326	0.112446	0.33023	0.31234	1.05016	1.71017	6.63568	11.1943
	U049	Perinatal conditions	14.2951	0	0	0	0	0	0	14.2951		U049	Perinatal conditions	9.68208	0	0	0	0	0	0	9.68208		U049	Perinatal conditions	12.053	0	0	0	0	0	0	12.053
	U059	Noncommunicable diseases	5.83034	2.38062	9.22586	39.3697	195.129	282.871	618.794	1153.6		U059	Noncommunicable diseases	5.34341	1.84649	5.08044	22.7958	100.921	165.978	532.441	834.406		U059	Noncommunicable diseases	5.59368	2.1204	7.1825	31.0168	147.202	219.966	567.071	980.152
	U060	Malignant neoplasms	0.215938	1.09634	3.06624	12.5939	68.7188	81.8311	95.3048	262.827		U060	Malignant neoplasms	0.365361	0.494595	1.81444	12.6374	45.4384	43.6793	55.7562	160.186		U060	Malignant neoplasms	0.288563	0.803182	2.44921	12.6158	56.8751	61.3002	71.616	205.948
	U079	Diabetes mellitus	0	0	0.217079	0.876099	4.53607	7.89923	13.3749	26.9033		U079	Diabetes mellitus	0	0	0.334974	0.592799	2.54253	7.09744	16.3401	26.9079		U079	Diabetes mellitus	0	0	0.275192	0.733321	3.52188	7.46776	15.151	27.1492
	U081	Neuropsychiatric conditions	0.259126	0.250591	1.7909	2.05336	5.50064	4.05247	6.77028	20.6774		U081	Neuropsychiatric conditions	0.274021	0.362703	0.753692	0.835308	1.30903	1.74788	4.54861	9.83124		U081	Neuropsychiatric conditions	0.266366	0.305209	1.27964	1.43948	3.3682	2.81229	5.43955	14.9107
	U104	Cardiovascular diseases	0.215938	0.281915	2.38787	17.3303	93.7976	154.714	434.908	703.635		U104	Cardiovascular diseases	0.182681	0.395676	1.08867	6.25134	41.5113	96.3098	418.346	564.085		U104	Cardiovascular diseases	0.199774	0.337337	1.74747	11.7467	67.1974	123.285	424.987	629.501
	U111	Respiratory diseases	0.0863754	0.219267	0.488428	0.985611	5.86561	15.4076	35.1297	58.1826		U111	Respiratory diseases	0.182681	0.098919	0.195402	0.592799	2.81944	5.42019	17.2911	26.6005		U111	Respiratory diseases	0.133183	0.160636	0.34399	0.787641	4.3159	10.033	24.4448	40.2191
	U115	Digestive diseases	0.0431877	0.125296	0.624102	3.83293	12.5133	12.754	18.6301	48.5229		U115	Digestive diseases	0.0456702	0.098919	0.195402	0.889199	3.80121	6.47951	11.0308	22.5407		U115	Digestive diseases	0.0443943	0.112446	0.412788	2.34934	8.08111	9.37745	14.0783	34.4558
	U120	Genitourinary diseases	0.0431877	0.0939717	0.325618	1.09512	3.05012	4.87531	12.428	21.9113		U120	Genitourinary diseases	0.0456702	0.065946	0.251231	0.511963	2.21528	3.90183	7.08443	14.0763		U120	Genitourinary diseases	0.0443943	0.0803182	0.288951	0.801221	2.6254	4.35144	9.2273	17.419
	U148	Injuries	1.25244	1.59752	12.482	15.1675	18.9264	10.8409	15.6711	75.9378		U148	Injuries	0.776393	0.791352	3.04268	3.42207	4.85851	4.20197	6.40293	23.4959		U148	Injuries	1.02107	1.20477	7.8292	9.24799	11.7695	7.26824	10.1197	48.4604
	U149	Unintentional injuries	1.25244	1.37825	7.0008	7.96702	9.17642	4.93702	6.60458	38.3165		U149	Unintentional injuries	0.776393	0.593514	1.89819	0.916145	1.86285	1.34181	2.91618	10.3051		U149	Unintentional injuries	1.02107	0.995946	4.48562	4.41351	5.45571	3.00231	4.39531	23.7695
	U156	Intentional injuries	0	0.219267	5.50838	7.20043	9.74994	5.90385	9.09017	37.672		U156	Intentional injuries	0	0.197838	1.14449	2.50592	2.99566	2.86016	3.48674	13.1908		U156	Intentional injuries	0	0.208827	3.35734	4.83449	6.31377	4.26593	5.73384	24.7142
EURO A						Age intervals											Age intervals											Age intervals
		MALES	A0-4M	A5-14M	A15-29M	A30-44M	A45-59M	A60-69	A70+	Total_M			FEMALES	A0-4F	A5-14F	A15-29F	A30-44F	A45-59F	A60-69	A70+	Total_F			PERSONS	A0-4F	A5-14F	A15-29F	A30-44F	A45-59F	A60-69	A70+	Total_P
	Code	Cause										Code	Cause										Code	Cause
	U000	All Causes	10.2005	2.2423	18.5109	34.8942	119.386	164.59	491.479	841.302		U000	All Causes	8.22113	1.6503	6.60003	17.1797	60.6382	79.3976	390.76	564.447		U000	All Causes	9.23721	1.95368	12.659	26.1051	89.872	119.868	429.126	688.821
	U001	Communicable, maternal, perinatal and nutritional conditions	5.17199	0.117691	0.684012	2.56743	3.69766	4.75549	29.9054	46.8997		U001	Communicable, maternal, perinatal and nutritional conditions	4.10723	0.12474	0.437849	1.00244	1.63952	2.53761	26.5781	36.4275		U001	Communicable, maternal, perinatal and nutritional conditions	4.6538	0.121128	0.563071	1.79096	2.66369	3.59121	27.8455	41.2294
	U002	Infectious and parasitic diseases	0.419997	0.0790239	0.509499	2.07124	1.95546	1.77992	4.67701	11.4921		U002	Infectious and parasitic diseases	0.351238	0.0837838	0.264929	0.647992	0.745384	1.05979	3.95483	7.10795		U002	Infectious and parasitic diseases	0.386534	0.0813445	0.38934	1.36509	1.34754	1.40189	4.22992	9.20166
	U038	Respiratory infections	0.210546	0.0355619	0.166204	0.479625	1.69267	2.90742	24.4487	29.9407		U038	Respiratory infections	0.129377	0.0348026	0.110598	0.269878	0.858182	1.42896	21.5416	24.3734		U038	Respiratory infections	0.171044	0.0351917	0.138885	0.375559	1.27344	2.1313	22.649	26.7744
	U049	Perinatal conditions	4.5332	0.0024764	0.00596086	0.00343881	0.00105814	0.000458182	0	4.5466		U049	Perinatal conditions	3.61877	0.00302706	0.00286714	0.00191195	0.000519652	0.000836773	0	3.62793		U049	Perinatal conditions	4.08818	0.00274486	0.0044409	0.00268126	0.000787612	0.000656923	0	4.09949
	U059	Noncommunicable diseases	4.30161	1.19169	5.75944	20.6411	103.343	153.253	448.386	736.875		U059	Noncommunicable diseases	3.56847	1.02158	3.11143	13.0565	54.7781	74.3289	354.119	503.984		U059	Noncommunicable diseases	3.94482	1.10876	4.45845	16.878	78.9448	111.822	390.027	607.184
	U060	Malignant neoplasms	0.277467	0.479176	1.65965	6.6298	46.4833	68.0061	130.104	253.639		U060	Malignant neoplasms	0.22848	0.40126	1.15772	7.21077	32.8115	35.9615	70.8598	148.631		U060	Malignant neoplasms	0.253627	0.44119	1.41305	6.91805	39.6148	51.1843	93.427	193.252
	U079	Diabetes mellitus	0.0022337	0.00128721	0.0572116	0.33761	1.77864	3.25918	9.79605	15.2322		U079	Diabetes mellitus	0.00294028	0.00611696	0.0306612	0.16702	0.809241	2.17099	10.9654	14.1523		U079	Diabetes mellitus	0.00257757	0.00364186	0.0441673	0.252971	1.29163	2.68793	10.5199	14.8029
	U081	Neuropsychiatric conditions	0.384425	0.222332	1.81532	3.08277	4.67149	4.10499	18.4617	32.743		U081	Neuropsychiatric conditions	0.304094	0.166291	0.547898	1.00824	2.31001	2.41638	20.9444	27.6973		U081	Neuropsychiatric conditions	0.345331	0.195011	1.19263	2.05348	3.48512	3.21855	19.9987	30.4888
	U104	Cardiovascular diseases	0.2682	0.12523	1.10805	6.11511	34.1695	56.4725	215.442	313.7		U104	Cardiovascular diseases	0.212941	0.094165	0.56742	2.37635	10.7897	23.096	199.997	237.133		U104	Cardiovascular diseases	0.241307	0.110085	0.842435	4.26011	22.4239	38.9515	205.88	272.709
	U111	Respiratory diseases	0.103476	0.0452264	0.255142	0.583528	3.00353	8.03892	38.3037	50.3335		U111	Respiratory diseases	0.065071	0.0432255	0.120561	0.302114	1.68023	3.44566	18.4722	24.129		U111	Respiratory diseases	0.0847854	0.0442509	0.189022	0.443904	2.33873	5.62768	26.0264	34.7548
	U115	Digestive diseases	0.0934677	0.030517	0.220379	2.93667	10.4651	9.42557	18.1571	41.3288		U115	Digestive diseases	0.0766429	0.0225197	0.136644	1.21016	4.2868	4.28597	16.0303	26.049		U115	Digestive diseases	0.0852796	0.0266181	0.179239	2.08006	7.36122	6.72753	16.8404	33.3004
	U120	Genitourinary diseases	0.0283582	0.0029905	0.0466789	0.168932	0.75017	1.44885	8.98675	11.4327		U120	Genitourinary diseases	0.0237975	0.0100819	0.0464607	0.105801	0.506824	0.979801	6.87376	8.54653		U120	Genitourinary diseases	0.0261387	0.00644777	0.0465717	0.13761	0.627917	1.20262	7.67864	9.72595
	U148	Injuries	0.726908	0.932918	12.0674	11.6857	12.345	6.58149	13.1878	57.5273		U148	Injuries	0.545428	0.503971	3.05076	3.12076	4.22066	2.53109	10.0622	24.0349		U148	Injuries	0.638587	0.723793	7.6375	7.4362	8.26347	4.45523	11.2528	40.4076
	U149	Unintentional injuries	0.665077	0.827274	8.74913	6.68716	7.19978	4.29171	10.3148	38.7349		U149	Unintentional injuries	0.484067	0.444199	2.14637	1.58858	2.2364	1.6578	9.22628	17.7837		U149	Unintentional injuries	0.576985	0.640513	5.50516	4.15749	4.70626	2.90904	9.64092	28.1364
	U156	Intentional injuries	0.0618305	0.105644	3.31832	4.99857	5.14521	2.28978	2.87301	18.7924		U156	Intentional injuries	0.0613611	0.0597721	0.904392	1.53218	1.98426	0.873287	0.835954	6.25121		U156	Intentional injuries	0.0616021	0.0832803	2.13234	3.27871	3.55721	1.54619	1.61191	12.2712
EURO B						Age intervals											Age intervals											Age intervals
		MALES	A0-4M	A5-14M	A15-29M	A30-44M	A45-59M	A60-69	A70+	Total_M			FEMALES	A0-4F	A5-14F	A15-29F	A30-44F	A45-59F	A60-69	A70+	Total_F			PERSONS	A0-4F	A5-14F	A15-29F	A30-44F	A45-59F	A60-69	A70+	Total_P
	Code	Cause										Code	Cause										Code	Cause
	U000	All Causes	61.5207	8.07965	30.5758	69.1109	216.578	291.467	615.962	1293.29		U000	All Causes	52.9007	5.7558	13.7415	32.9118	103.405	157.654	518.903	885.271		U000	All Causes	57.3022	6.9403	22.2912	51.0895	158.708	218.81	556.871	1072.01
	U001	Communicable, maternal, perinatal and nutritional conditions	48.3679	2.30571	3.74436	7.51126	9.76894	8.09507	17.5405	97.3337		U001	Communicable, maternal, perinatal and nutritional conditions	41.6779	2.11541	2.77379	3.38905	3.84273	3.76819	14.3586	71.9257		U001	Communicable, maternal, perinatal and nutritional conditions	45.0939	2.21241	3.26672	5.45905	6.73863	5.7457	15.6033	84.1198
	U002	Infectious and parasitic diseases	13.4169	1.362	2.67483	5.65958	6.2798	3.62378	3.74378	36.7607		U002	Infectious and parasitic diseases	12.5216	1.30624	1.14893	1.91693	2.06413	1.41155	2.52545	22.8948		U002	Infectious and parasitic diseases	12.9788	1.33467	1.9239	3.79633	4.12416	2.4226	3.00204	29.5825
	U038	Respiratory infections	14.7289	0.880739	0.880605	1.60031	3.20583	4.19723	13.218	38.7116		U038	Respiratory infections	13.1989	0.75064	0.620476	0.759331	1.4755	2.13626	11.204	30.145		U038	Respiratory infections	13.9802	0.816954	0.75259	1.18163	2.32104	3.07818	11.9918	34.1224
	U049	Perinatal conditions	19.895	0	0	0	0	0	0.00244678	19.8974		U049	Perinatal conditions	15.6938	0	0.00208749	0	0	0	0	15.6959		U049	Perinatal conditions	17.839	0	0.0010273	0	0	0	0.000957144	17.841
	U059	Noncommunicable diseases	10.2772	2.90517	10.799	41.3072	183.601	273.282	587.465	1109.64		U059	Noncommunicable diseases	8.81464	2.11375	7.22016	24.9107	92.5566	150.593	498.104	784.313		U059	Noncommunicable diseases	9.56147	2.51715	9.03775	33.1443	137.046	206.665	533.061	931.033
	U060	Malignant neoplasms	0.51279	0.819611	2.41957	9.42655	51.8008	69.7557	85.0664	219.801		U060	Malignant neoplasms	0.420813	0.563872	1.86297	9.53278	32.213	33.0886	46.966	124.648		U060	Malignant neoplasms	0.467778	0.694226	2.14565	9.47943	41.7847	49.8465	61.8703	166.289
	U079	Diabetes mellitus	0.0201696	0.0302303	0.18341	0.731231	3.5501	5.54207	7.05561	17.1128		U079	Diabetes mellitus	0.0291283	0.0362703	0.198946	0.496981	2.12241	5.14478	8.61059	16.6391		U079	Diabetes mellitus	0.0245538	0.0331916	0.191055	0.614612	2.82006	5.32635	8.0023	17.0121
	U081	Neuropsychiatric conditions	0.879105	0.568331	1.33225	2.81125	4.51447	2.7844	3.71769	16.6075		U081	Neuropsychiatric conditions	0.704	0.455536	0.848848	1.20135	1.66292	1.47441	2.94405	9.29112		U081	Neuropsychiatric conditions	0.793412	0.513029	1.09436	2.00977	3.05636	2.07311	3.24669	12.7867
	U104	Cardiovascular diseases	1.03456	0.553427	3.74041	18.5277	95.2918	159.267	434.035	712.449		U104	Cardiovascular diseases	0.840261	0.331471	2.14658	8.66277	43.0657	93.2284	402.011	550.286		U104	Cardiovascular diseases	0.939472	0.444605	2.95605	13.6165	68.5864	123.41	414.538	624.491
	U111	Respiratory diseases	0.97532	0.255007	0.73356	1.91613	7.43227	15.7114	30.7297	57.7534		U111	Respiratory diseases	0.904129	0.180223	0.531719	1.13119	3.52747	6.03191	17.9716	30.2782		U111	Respiratory diseases	0.94048	0.218342	0.63423	1.52535	5.43559	10.4557	22.9624	42.1721
	U115	Digestive diseases	0.564888	0.283853	1.45978	6.03039	16.7496	14.936	17.0868	57.1114		U115	Digestive diseases	0.451389	0.181835	0.747686	2.27828	6.67961	7.94986	13.0765	31.3651		U115	Digestive diseases	0.509344	0.233835	1.10934	4.16243	11.6004	11.1427	14.6453	43.4034
	U120	Genitourinary diseases	0.221247	0.172781	0.619383	1.36954	3.17974	4.07277	7.86047	17.4959		U120	Genitourinary diseases	0.197702	0.17153	0.587608	1.17558	2.27133	2.69422	4.71148	11.8095		U120	Genitourinary diseases	0.209724	0.172167	0.603746	1.27298	2.71523	3.32426	5.94332	14.2414
	U148	Injuries	2.87553	2.86877	16.0325	20.2925	23.208	10.0901	10.9569	86.3242		U148	Injuries	2.40815	1.52664	3.74752	4.61204	7.00595	3.29281	6.43954	29.0326		U148	Injuries	2.6468	2.21075	9.98677	12.4861	14.9232	6.39938	8.20667	56.8597
	U149	Unintentional injuries	2.83732	2.51041	10.4587	12.7784	14.9828	7.18812	8.20057	58.9562		U149	Unintentional injuries	2.36212	1.20607	2.31063	2.86492	4.48177	2.41413	5.49403	21.1337		U149	Unintentional injuries	2.60477	1.87091	6.44883	7.84306	9.61317	4.59598	6.55279	39.5295
	U156	Intentional injuries	0.0382073	0.358365	5.57382	7.51407	8.2252	2.902	2.75634	27.368		U156	Intentional injuries	0.0460301	0.320573	1.43688	1.74712	2.52418	0.878681	0.945505	7.89897		U156	Intentional injuries	0.0420357	0.339836	3.53794	4.64304	5.31003	1.8034	1.65388	17.3302
EURO C						Age intervals											Age intervals											Age intervals
		MALES	A0-4M	A5-14M	A15-29M	A30-44M	A45-59M	A60-69	A70+	Total_M			FEMALES	A0-4F	A5-14F	A15-29F	A30-44F	A45-59F	A60-69	A70+	Total_F			PERSONS	A0-4F	A5-14F	A15-29F	A30-44F	A45-59F	A60-69	A70+	Total_P
	Code	Cause										Code	Cause										Code	Cause
	U000	All Causes	40.1748	7.63695	78.2013	187.322	431.953	432.391	709.366	1887.05		U000	All Causes	30.8761	4.39596	20.4023	50.9366	143.038	176.243	551.782	977.673		U000	All Causes	35.6476	6.05185	49.6813	118.29	276.922	280.53	597.595	1364.72
	U001	Communicable, maternal, perinatal and nutritional conditions	22.8438	0.436515	6.10306	21.4224	33.2005	13.2648	8.06959	105.341		U001	Communicable, maternal, perinatal and nutritional conditions	16.9201	0.382421	2.25316	4.18044	5.18577	2.47065	3.34931	34.7418		U001	Communicable, maternal, perinatal and nutritional conditions	19.9598	0.410059	4.20339	12.6953	18.1678	6.86534	4.72159	67.0233
	U002	Infectious and parasitic diseases	3.04124	0.197829	5.71521	19.1032	21.7284	6.10704	2.76868	58.6616		U002	Infectious and parasitic diseases	2.32304	0.174654	1.57781	3.09412	2.7135	0.975844	0.859816	11.7188		U002	Infectious and parasitic diseases	2.69158	0.186494	3.67368	11.0001	11.525	3.06494	1.41476	33.5566
	U038	Respiratory infections	4.93659	0.204078	0.303067	2.18638	11.1784	6.95928	5.0937	30.8615		U038	Respiratory infections	3.93679	0.181267	0.261984	0.709588	2.30358	1.34671	2.31607	11.056		U038	Respiratory infections	4.44983	0.192922	0.282795	1.43889	6.41619	3.63179	3.12359	19.536
	U049	Perinatal conditions	14.7778	0.000840637	0	0	0	0	0	14.7786		U049	Perinatal conditions	10.5901	0	0	0	0	0	0	10.5901		U049	Perinatal conditions	12.739	0.000429499	0	0	0	0	0	12.7394
	U059	Noncommunicable diseases	12.5594	2.44324	15.1187	75.4813	293.044	380.266	679.15	1458.06		U059	Noncommunicable diseases	10.3642	1.91719	7.02127	30.4228	115.446	164.104	539.147	868.422		U059	Noncommunicable diseases	11.4906	2.18596	11.1232	52.6746	197.745	252.111	579.849	1107.18
	U060	Malignant neoplasms	0.638867	0.752592	2.54484	10.8625	71.0342	92.4954	105.838	284.167		U060	Malignant neoplasms	0.588943	0.593262	1.99421	11.1183	38.3877	37.7755	48.5112	138.969		U060	Malignant neoplasms	0.614561	0.674667	2.27314	10.992	53.5161	60.0539	65.1774	193.302
	U079	Diabetes mellitus	0.0067437	0.0179902	0.334881	0.747952	1.72103	1.93102	2.30474	7.06436		U079	Diabetes mellitus	0.00299126	0.0305044	0.375574	0.529059	1.70099	2.80532	2.97303	8.41748		U079	Diabetes mellitus	0.0049168	0.0241106	0.354961	0.637158	1.71028	2.44936	2.77875	7.95954
	U081	Neuropsychiatric conditions	1.09598	0.699635	2.48255	4.7714	7.69755	2.99534	2.45547	22.1979		U081	Neuropsychiatric conditions	0.822178	0.503742	1.03481	1.8421	2.70888	1.04817	1.8415	9.80138		U081	Neuropsychiatric conditions	0.962676	0.603828	1.76819	3.28871	5.02064	1.84094	2.01999	15.505
	U104	Cardiovascular diseases	0.474288	0.211103	5.90577	42.6532	170.334	238.067	501.771	959.416		U104	Cardiovascular diseases	0.41464	0.151902	1.64471	10.6696	56.1129	107.966	459.216	636.175		U104	Cardiovascular diseases	0.445248	0.182149	3.80322	26.4645	109.043	160.935	471.587	772.46
	U111	Respiratory diseases	0.631847	0.0690264	0.624072	2.48415	12.1355	24.5006	44.6375	85.0828		U111	Respiratory diseases	0.542498	0.0535215	0.248649	0.690428	2.45916	4.25319	14.1546	22.402		U111	Respiratory diseases	0.588347	0.0614433	0.438826	1.57625	6.94321	12.4967	23.0166	45.1213
	U115	Digestive diseases	0.291728	0.090877	1.73075	11.1151	24.6637	15.9459	15.0752	68.9132		U115	Digestive diseases	0.259777	0.0847059	0.619695	3.46706	9.65023	7.01314	9.25338	30.348		U115	Digestive diseases	0.276173	0.0878589	1.18252	7.24401	16.6075	10.65	10.9459	46.9939
	U120	Genitourinary diseases	0.0722622	0.0497081	0.629778	1.57663	3.24148	2.9729	5.75393	14.2967		U120	Genitourinary diseases	0.0537783	0.0568635	0.420045	1.02842	2.30166	1.97177	2.04439	7.87692		U120	Genitourinary diseases	0.0632632	0.0532076	0.526289	1.29915	2.73717	2.37937	3.12283	10.1813
	U148	Injuries	4.77159	4.7572	56.9795	90.4187	105.709	38.8604	22.1463	323.643		U148	Injuries	3.59184	2.09635	11.1279	16.3334	22.4066	9.66819	9.28511	74.5094		U148	Injuries	4.19722	3.45583	34.3548	52.9199	61.009	21.5534	13.0241	190.514
	U149	Unintentional injuries	4.45472	3.92842	32.8118	54.7859	69.4081	26.125	12.9712	204.485		U149	Unintentional injuries	3.2461	1.70487	6.83585	10.2072	15.6523	6.73693	6.14846	50.5316		U149	Unintentional injuries	3.86629	2.84093	19.9944	32.2221	40.5628	14.6305	8.13198	122.249
	U156	Intentional injuries	0.316875	0.828781	24.1677	35.6328	36.3007	12.7355	9.1751	119.157		U156	Intentional injuries	0.345738	0.391483	4.29202	6.12622	6.75435	2.93126	3.13664	23.9777		U156	Intentional injuries	0.330927	0.614908	14.3604	20.6979	20.4462	6.92292	4.89215	68.2653
